# Supplementary material for: Bacterial Luciferases from Vibrio harveyi and Photobacterium leiognathi Demonstrate Different Conformational Stability as Detected by Time-Resolved Fluorescence Spectroscopy
Source: MDPI journal article supplement (doi:10.3390/ijms221910449), 2021-09-28
Supplement: s1 [file s1]

**Bacterial luciferases from *Vibrio harveyi* and *Photobacterium leiognathi* demonstrate different conformational stability as detected by time-resolved fluorescence spectroscopy**

Elena V. Nemtseva <sup>1,2,\*</sup>, Dmitry V. Gulnov <sup>1</sup>, Marina A. Gerasimova <sup>1</sup>, Lev A. Sukovatyi <sup>1</sup>, Ludmila P. Burakova <sup>1,2</sup>, Natalia E. Karuzina <sup>1</sup>, Bogdan S. Melnik <sup>3</sup>, Valentina A. Kratasyuk <sup>1,2</sup>

<sup>1</sup> Siberian Federal University, 660041, Svobodny 79, Krasnoyarsk, Russia

<sup>2</sup> Institute of Biophysics SB RAS, 660036, Akademgorodok 50/50, Krasnoyarsk, Russia

<sup>3</sup> Institute of Protein Research, Russian Academy of Sciences, 142290, Institutskaya 4, Pushchino, Moscow Region, Russia

**Supplementary Materials**

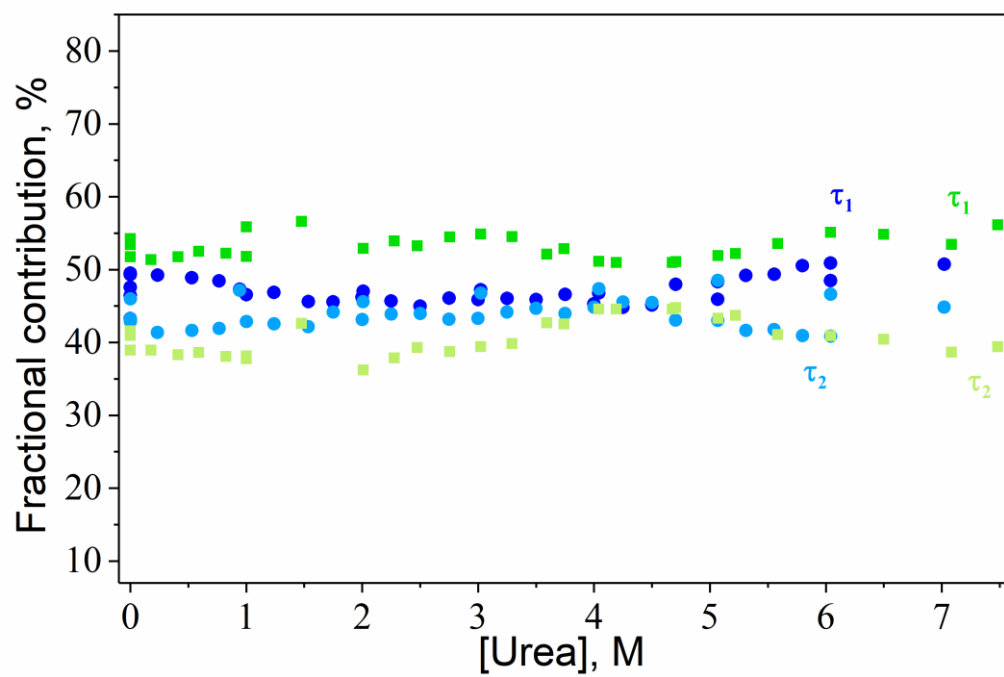

Figure S1. The fractional contribution of the lifetime components (DAS) in fluorescence spectra of the *V. harveyi* (green) and the *P. leiognathi* (blue) luciferases at various urea concentrations

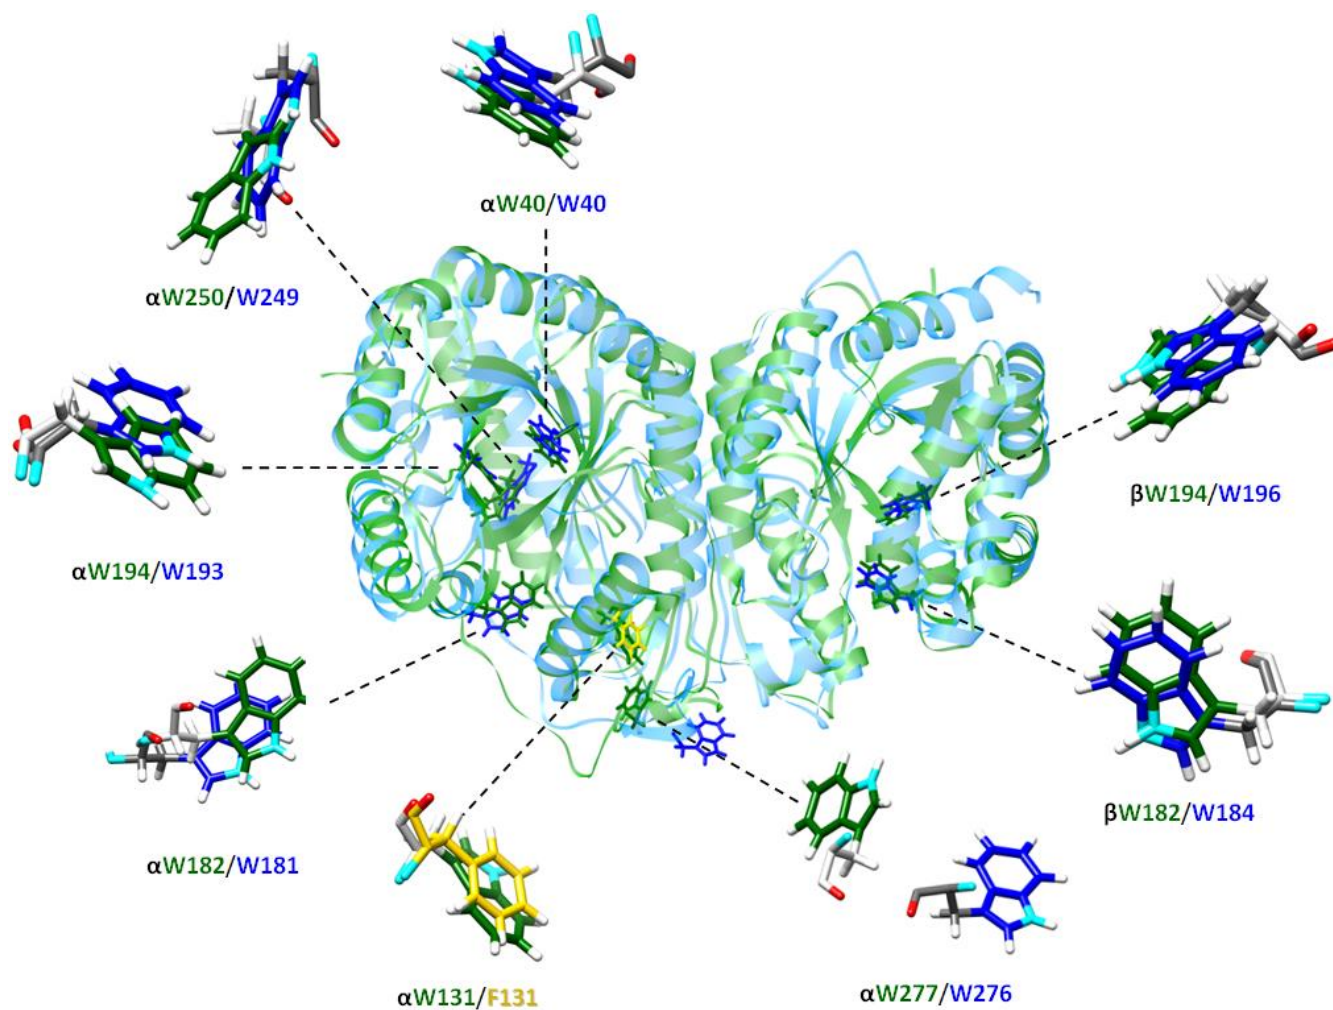

Figure S2. The relative positions of tryptophans of *V. harveyi* (green) and *P. leiognathi* (blue) luciferases after tertiary structure alignment. In the position 131 of *P. leiognathi*  $\alpha$ -subunit there is phenylalanine (yellow). Tryptophan position is indicated basing on the individual sequence of the protein.

### Details of molecular dynamics simulation

Table S1: The parameters of the systems used for MD simulations of the *Vibrio harveyi* (*V.h.*) and the *Photobacterium leiognathi* (*P.l.*) luciferases

| Protein      | Number of water molecules. pcs | Number of Na <sup>+</sup> ions, pcs | Total number of atoms in the system, pcs | Equilibrated cell size, Å         |
|--------------|--------------------------------|-------------------------------------|------------------------------------------|-----------------------------------|
| <i>P. l.</i> | 42505                          | 30                                  | 138296                                   | $110.7 \times 110.7 \times 110.7$ |
| <i>V. h.</i> | 40821                          | 36                                  | 132922                                   | $109.2 \times 109.2 \times 109.2$ |
